# Supplementary material
Source: MDPI journal article supplement (https://www.mdpi.com/2073-445X/13/3/306)
Supplement: s1 [file s1]

## Supplementary information

The parameters used to evaluate the ecosystem services mentioned in Section 2.2 are detailed here.

### (1) Carbon Sequestration Service

We calculated the carbon density data for the study area by collating existing research data within our study area. The respective carbon density data for each land type were derived from the aforementioned research studies[1-3], as illustrated in Table S1.

**Table S1.** The carbon density of each land use/land cover (mg/ha).

| Land use/land cover | C_above | C_below | C_soil | C_dead |
|---------------------|---------|---------|--------|--------|
| Farmland            | 9.0     | 4.0     | 25.0   | 0.3    |
| Forest              | 39.6    | 30.3    | 42.4   | 7.2    |
| Water bodies        | 1.0     | 0.5     | 16.0   | 0.0    |
| Grassland           | 18.1    | 13.7    | 31.0   | 0.4    |
| Built-up land       | 0.0     | 0.0     | 12.0   | 0.0    |
| Wetland             | 1.7     | 1.0     | 15.0   | 0.0    |
| Shrubland           | 29.1    | 19.4    | 2.8    | 32.1   |

Note: C\_above is carbon density in aboveground biomass; C\_below is carbon density in belowground biomass; C\_soil is carbon density in the soil; C\_dead is carbon density in dead matter.

### (2) Water Conservation Service

The table of biophysical parameters (Table S2) essential for assessing water yield in this study primarily encompasses plant root depth (Root Depth) and crop evapotranspiration coefficient (Kc). These parameters were sourced from pertinent literature references[4,5] , as well as the InVEST modeling manual.

**Table S2.** Biophysical table.

| Land use/land cover | Root_depth(mm) | Kc   | LULC_veg |
|---------------------|----------------|------|----------|
| Farmland            | 2100           | 0.65 | 1        |
| Forest              | 5200           | 0.93 | 1        |
| Water bodies        | 1              | 0.9  | 0        |
| Grassland           | 2300           | 0.75 | 1        |
| Built-up land       | 500            | 0.23 | 0        |

|           |      |     |   |
|-----------|------|-----|---|
| Wetland   | 1000 | 0.7 | 1 |
| Shrubland | 5200 | 0.9 | 0 |

Note: Root\_depth is Maximum root depth (mm); Kc is the evapotranspiration coefficient of plants corresponding to the land type; LULC\_veg means whether the the LULC class is vegetated

### (3) Soil and Water Conservation Service

We conducted a quantitative assessment of the spatial and temporal variations in soil retention. This assessment was performed using the Sediment Delivery Ratio module within the InVEST model. The specific parameters are adjusted based on the actual conditions in the study area [4,5]

**Table S3.** Biophysical table.

| Land use/land cover | usle_c | usle_p |
|---------------------|--------|--------|
| Farmland            | 0.23   | 0.30   |
| Forest              | 0.08   | 1.00   |
| Water bodies        | 0.00   | 0.00   |
| Grassland           | 0.24   | 1.00   |
| Built-up land       | 0.00   | 0.00   |
| Wetland             | 1.00   | 0.5    |
| Shrubland           | 0.02   | 1.0    |

### (4) Habitat Quality Service

The InVEST model necessitates the inclusion of a Threat Factor Table (Table S4) and Sensitivity Table (Table S5), and these are determined through a combination of referencing existing studies and tailoring them to the specific conditions within our study area [4,6].

**Table S4.** Threat source impact distance level weights.

| Threat factors | Maximum distance of influence | Weights | Spatial decay types |
|----------------|-------------------------------|---------|---------------------|
| Farmland       | 3.3                           | 0.85    | linear              |
| Built-up land  | 2.8                           | 0.9     | linear              |

**Table S5.** Sensitivity of threat factors for different land uses.

| Land use/land<br>cover | Habitat | Sensitivity to threats |                  |
|------------------------|---------|------------------------|------------------|
|                        |         | farmland               | residential area |
| Farmland               | 0       | 0                      | 0                |
| Forestland             | 1       | 0.65                   | 0.9              |
| Water bodies           | 1       | 0.45                   | 0.9              |
| Grassland              | 1       | 0.5                    | 0.9              |
| Built-up land          | 0       | 0                      | 0                |
| Wetland                | 1       | 0.65                   | 0.9              |
| Shrubland              | 1       | 0.7                    | 0.9              |

## References

- [1] Liu, H., Cui, J., & Zhang, J. Temporal and spatial evolution of carbon storage and ecological compensation in the coastal wetlands of the Yellow River Delta. *Ecological Economy*, 2023,1–22.
- [2] Zhou, F., Ma, T., Li, X., Cui, B. Simulation and evaluation of ecosystem services in the coastal wetlands of the Yellow River Delta. *Wetland Science*, 2015,13, 667–674.
- [3] Liu, Y. Assessment of Tea Plantation Ecosystem Services in Karst Areas Based on the InVEST Model. Yunnan University, 2021. DOI: 10.27456/d.cnki.gyndu.2021.001736.
- [4] Zhang, J. Spatiotemporal dynamics and driving mechanisms of ecosystem services in the Yellow River Delta. (Master's thesis). Shandong University.2023.
- [5] Zhang, E. Research on the Spatio-Temporal Patterns and Influencing Factors of Water Production Services and Soil Conservation Services in the Central Yunnan Urban Agglomeration (Master's thesis). Yunnan Normal University, 2021.
- [6] Wu, J.; Luo, J.; Zhang, H.; Qin, S.; Yu, M. Projections of Land Use Change and Habitat Quality Assessment by Coupling Climate Change and Development Patterns. *Science of The Total Environment* **2022**, 847, 157491, doi:10.1016/j.scitotenv.2022.157491.
